# Supplementary material
Source: PubMed Central journal article supplement (PMC6329801)
Supplement: 41418_2018_191_MOESM1_ESM.pdf [file 41418_2018_191_MOESM1_ESM.pdf]

Electronic supplementary material

**Loss of mitochondrial calcium uniporter rewires skeletal muscle metabolism and substrate preference**

Gaia Gherardi, Leonardo Nogara, Stefano Ciciliot, Gian Paolo Fadini, Bert Blaauw, Paola Braghetta, Paolo Bonaldo, Diego De Stefani, Rosario Rizzuto and Cristina Mammucari

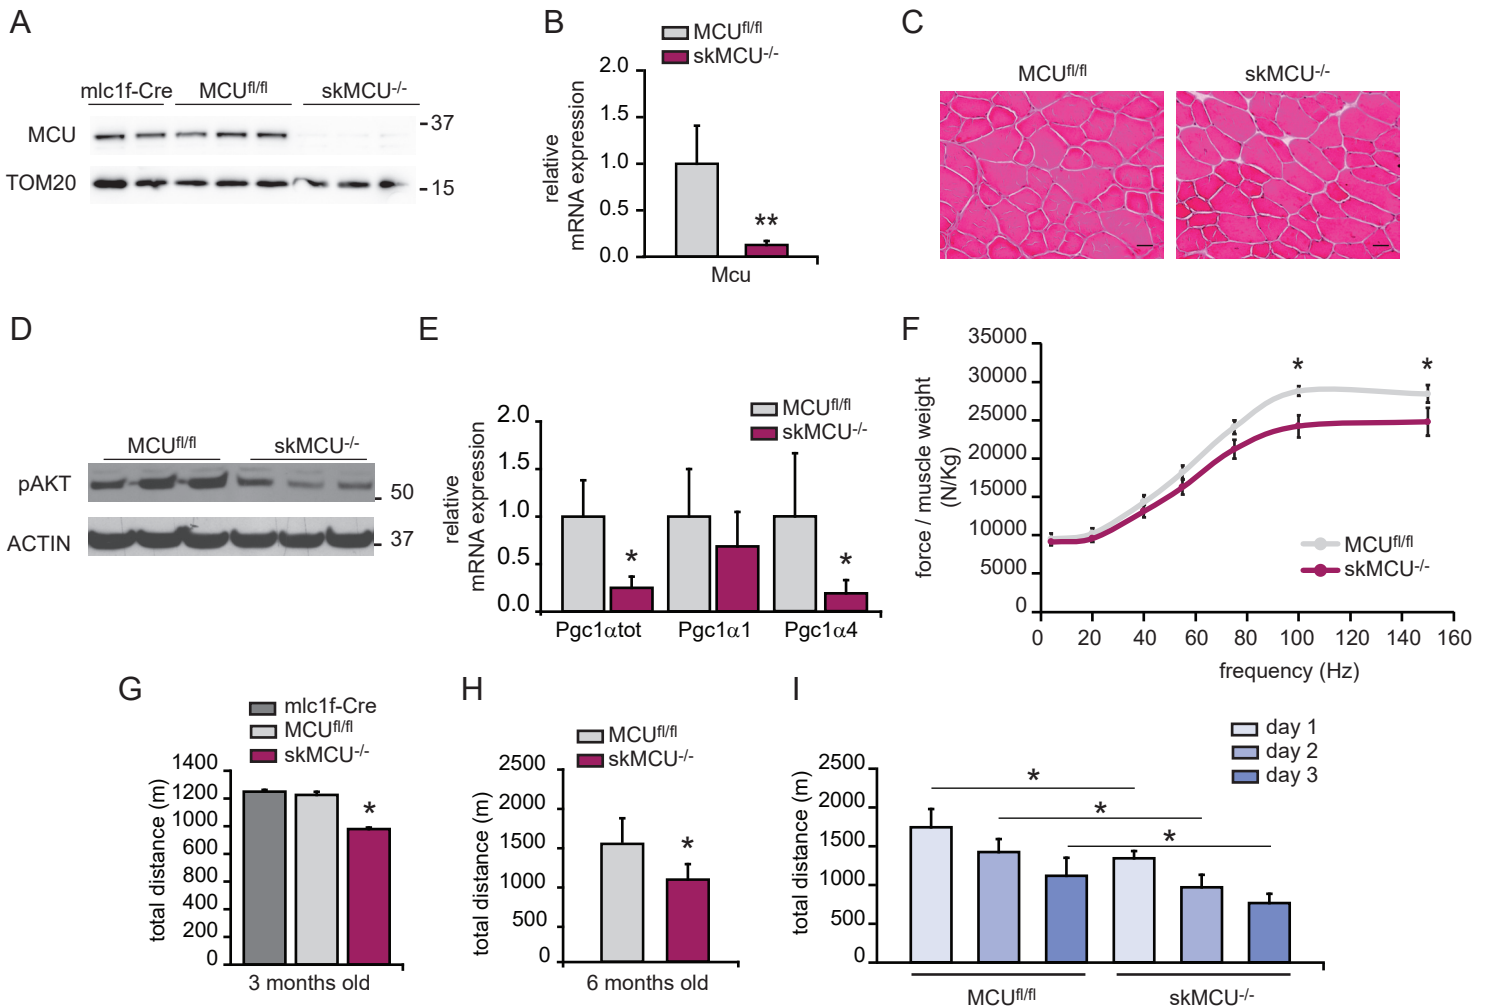

**Fig S1.** Anabolic pathways are downregulated in skMCU<sup>-/-</sup> mice, related to Figure 1

**A** Western blot analysis demonstrated efficient MCU deletion in skMCU<sup>-/-</sup> TA muscles. MCU<sup>fl/fl</sup> and mlc1f-Cre mice were used as controls. **B** MCU mRNA expression levels were suppressed in skMCU<sup>-/-</sup> TA muscles.  $p < 0.05$ , t- test (two-tailed, unpaired) of 4 animals per condition. Data are presented as mean  $\pm$ SD. **C** Hematoxylin & Eosin staining showed unaltered histological structure of skMCU<sup>-/-</sup> TA muscles. Scale bar 50 $\mu$ m. **D** Phosphorylation levels of AKT were decreased in skMCU<sup>-/-</sup> TA muscles compared to MCU<sup>fl/fl</sup> muscles. **E** Relative mRNA levels of PGC1 $\alpha$ 4 were decreased in skMCU<sup>-/-</sup> TA muscles compared to controls. \* $p < 0.05$ , t- test (two-tailed, unpaired) of 4 animals per condition. Data are presented as mean  $\pm$ SD. **F** Reduced *in vivo* force production from gastrocnemius muscles was measured in skMCU<sup>-/-</sup> mice compared to MCU<sup>fl/fl</sup> mice. \* $p < 0.05$ , Mann-Whitney rank sum test (two-tailed, unpaired) of 6 animals per condition. Data are presented as mean  $\pm$ SD. **G** Mean maximal running distance in a single bout of run on a treadmill of 3 month old mlc1f-Cre, MCU<sup>fl/fl</sup> and skMCU<sup>-/-</sup> mice indicated that MCU deletion negatively affects exercise performance. In addition, MCU<sup>fl/fl</sup> and mlc1f-Cre mice had no differences in running capacity. \* $p < 0.05$ , t- test (two-tailed, unpaired) of 4 animals per condition. Data are presented as mean  $\pm$ SD. **H** Mean maximal running distance in a single bout of run on a treadmill of 6 month old MCU<sup>fl/fl</sup> and skMCU<sup>-/-</sup> mice. \* $p < 0.05$ , t- test (two-tailed, unpaired) of 5 animals per condition. Data are presented as mean  $\pm$ SD. **I** Mean maximal running distances after each of 3 days of downhill run on a treadmill of MCU<sup>fl/fl</sup> and skMCU<sup>-/-</sup> mice. \* $p < 0.05$ , t- test (two-tailed, unpaired) of 5 animals per condition. Data are presented as mean  $\pm$ SD.

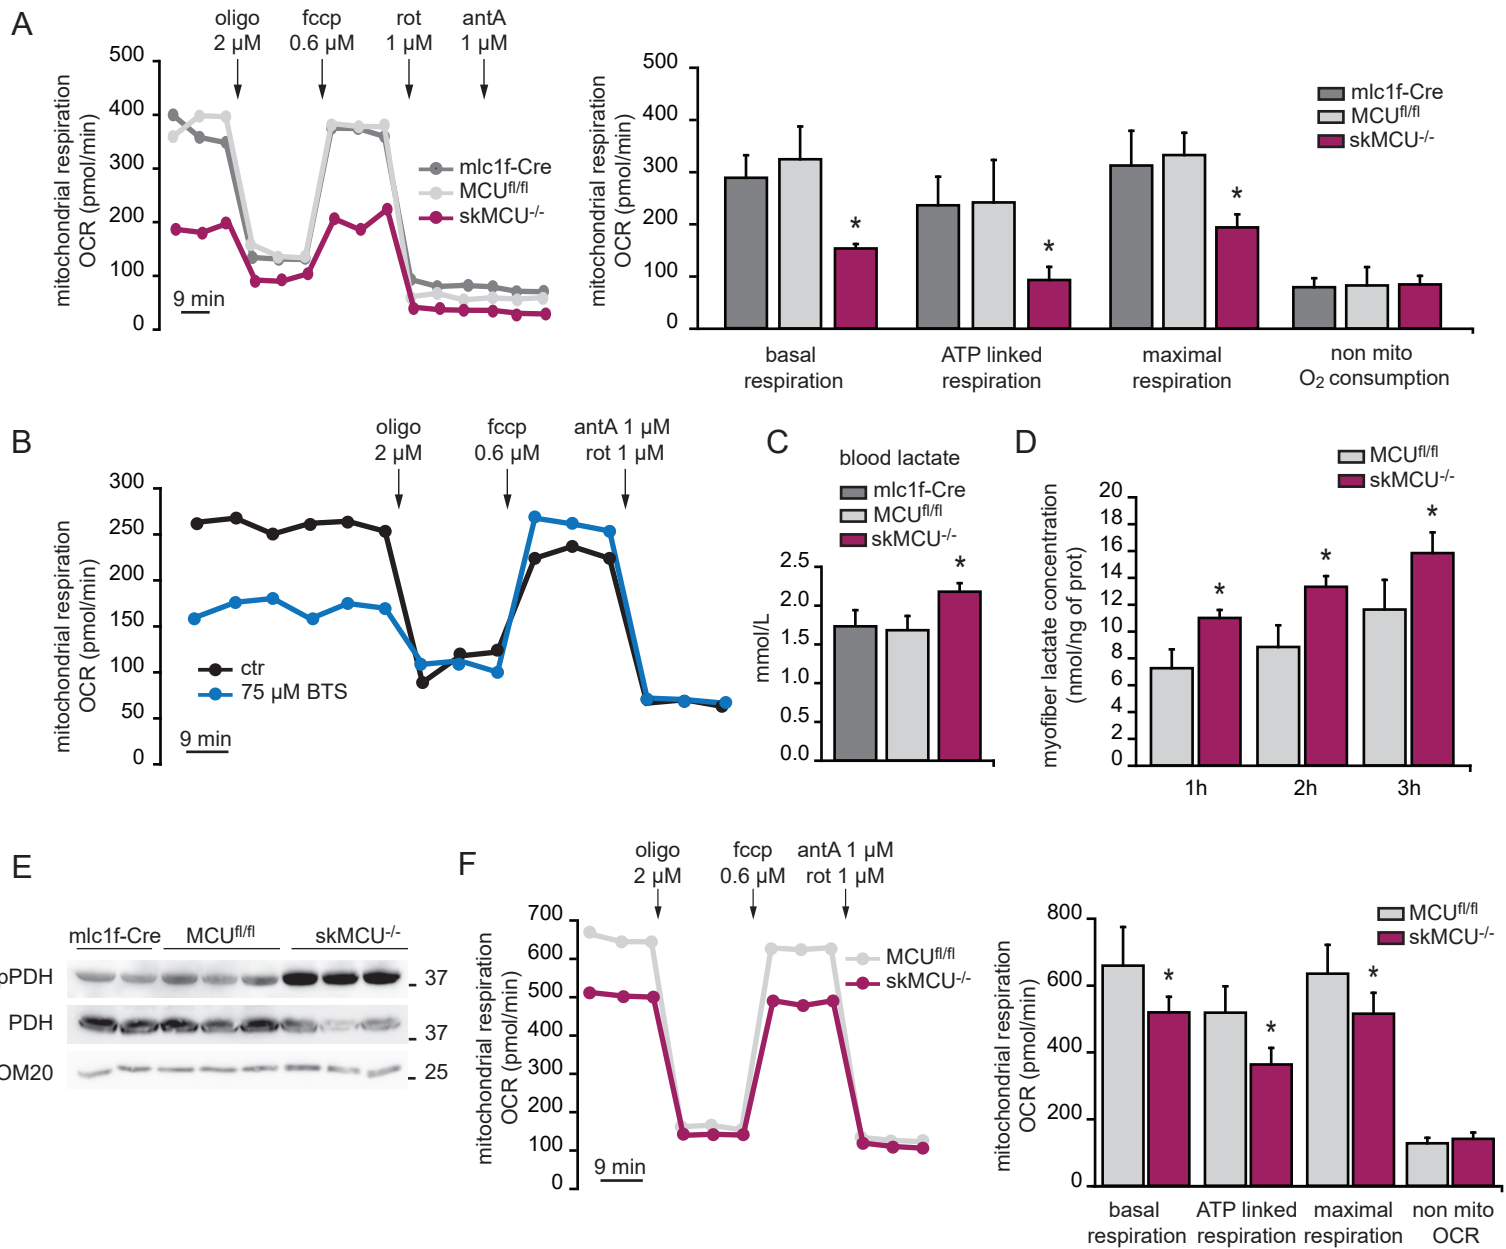

**Fig S2.** skMCU<sup>-/-</sup> mice show a metabolic rewiring toward  $\beta$ -oxidation, related to Figure 2

**A** OCR measurements indicated reduced respiratory capacity in skMCU<sup>-/-</sup> FDB myofibers compared to two different controls (mlc1f-Cre and MCU<sup>fl/fl</sup>). Left: representative traces. Right: quantification. To calculate basal and maximal respiration, non-mitochondrial O<sub>2</sub> consumption was subtracted from absolute values. ATP linked respiration was calculated as the difference between basal and oligomycin-insensitive O<sub>2</sub> consumption. Data are normalized on mean Calcein fluorescence. \**p* < 0.05, t- test (two-tailed, unpaired) of 10 samples per condition. Data are presented as mean  $\pm$ SD. **B** Treatment of freshly isolated myofibers with 75  $\mu$ M N-benzyl-P-toluenesulfonamide (BTS) decreased basal OCR. **C** Blood lactate concentration was increased in skMCU<sup>-/-</sup> mice compared to controls (mlc1f-Cre and MCU<sup>fl/fl</sup>). \**p* < 0.05, t- test (two-tailed, unpaired) of 4 animals per condition. Data are presented as mean  $\pm$ SD. **D** Lactate production was increased in skMCU<sup>-/-</sup> TA myofibers. \**p* < 0.05, t- test (two-tailed, unpaired) of 4 animals per condition. Data are presented as mean  $\pm$ SD. **E** Phosphorylation levels of PDH were increased in skMCU<sup>-/-</sup> TA muscles compared to controls (mlc1f-Cre and MCU<sup>fl/fl</sup>). **F** Exogenous FA oxidation was decreased in skMCU<sup>-/-</sup> FDB myofibers compared to controls. Left: 1 hour after the addition of palmitate to the medium, OCR measurements were performed as in A. Right: quantification. Data are normalized on mean Calcein fluorescence. \**p* < 0.05, t- test (two-tailed, unpaired) of 5 samples per condition. Data are presented as mean  $\pm$ SD.

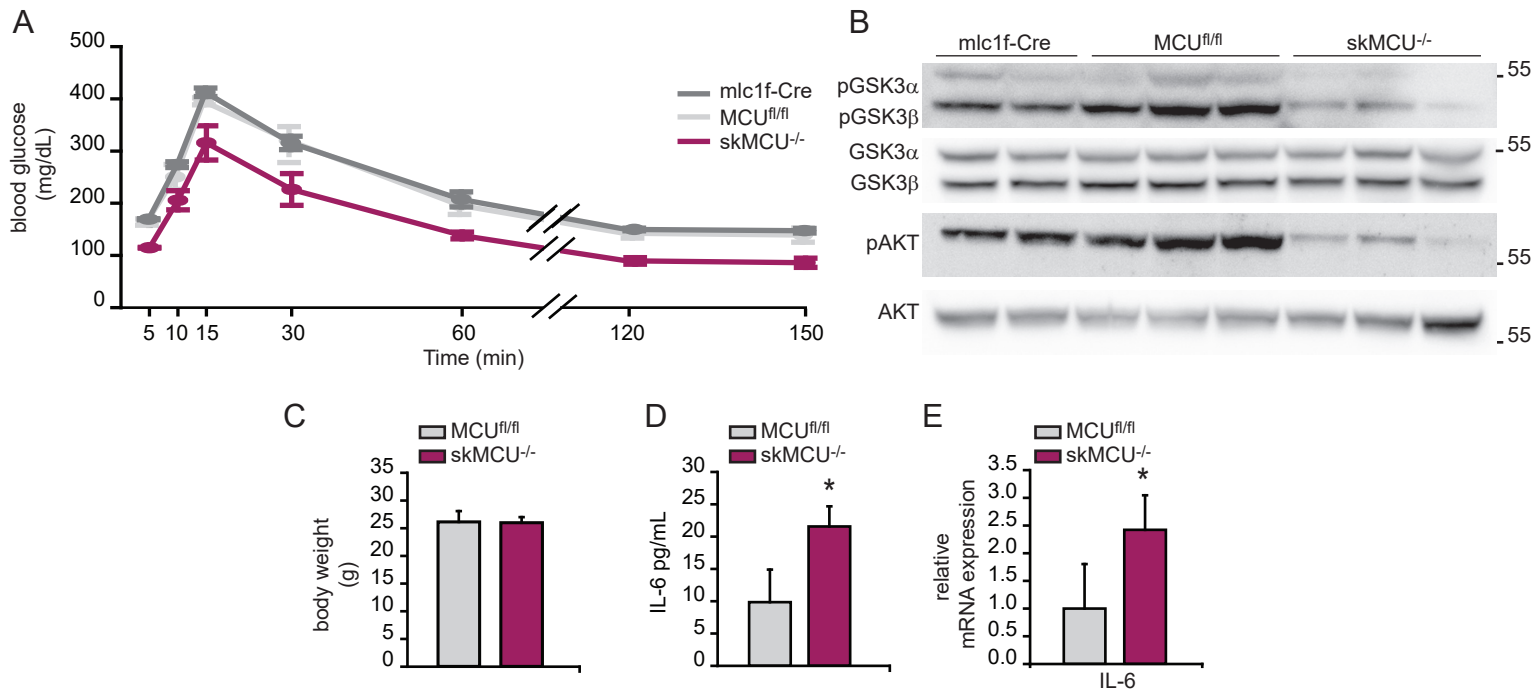

**Fig S3.** Skeletal muscle-specific MCU deletion triggers a whole body metabolic adaptation, related to Figure 4

**A** Glucose tolerance test of *mlc1f-Cre*, *MCU<sup>fl/fl</sup>* and *skMCU<sup>-/-</sup>* mice. *skMCU<sup>-/-</sup>* mice had decreased glycemia at all time points compared to *MCU<sup>fl/fl</sup>* and *mlc1f-Cre*. \* $p < 0.05$ , t- test (two-tailed, unpaired) of 5 animals per condition. Data are presented as mean  $\pm$ SD. **B** Phosphorylation levels of GSK3  $\alpha/\beta$  and AKT were decreased in *skMCU<sup>-/-</sup>* livers compared to controls (*mlc1f-Cre* and *MCU<sup>fl/fl</sup>*). Total AKT and GSK3  $\alpha/\beta$  were used as control. **C** Total body weight was unchanged between *skMCU<sup>-/-</sup>* and *MCU<sup>fl/fl</sup>* mice. Data are presented as mean  $\pm$ SD (4 animals per condition). **D** Plasma levels of IL-6 were increased in *skMCU<sup>-/-</sup>* mice compared to controls. \* $p < 0.05$ , t- test (two-tailed, unpaired) of 5 animals per condition. Data are presented as mean  $\pm$ SD. **E** Relative mRNA expression levels of the IL-6 in *skMCU<sup>-/-</sup>* compared to *MCU<sup>fl/fl</sup>* TA muscles. \* $p < 0.05$ , t- test (two-tailed, unpaired) of 5 animals per condition. Data are presented as mean  $\pm$ SD.

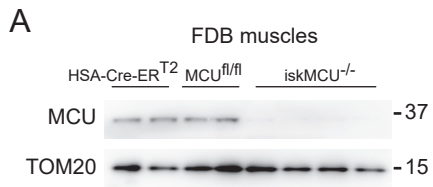

**Fig S4.** Downregulation of MCU expression during adulthood, related to Figure 5

**A** Western blot analysis demonstrated the MCU deletion in iskMCU<sup>-/-</sup> FDB muscles compared to controls (HSA-Cre-ER<sup>T2</sup> and MCU<sup>fl/fl</sup>). All animals received tamoxifen treatment.

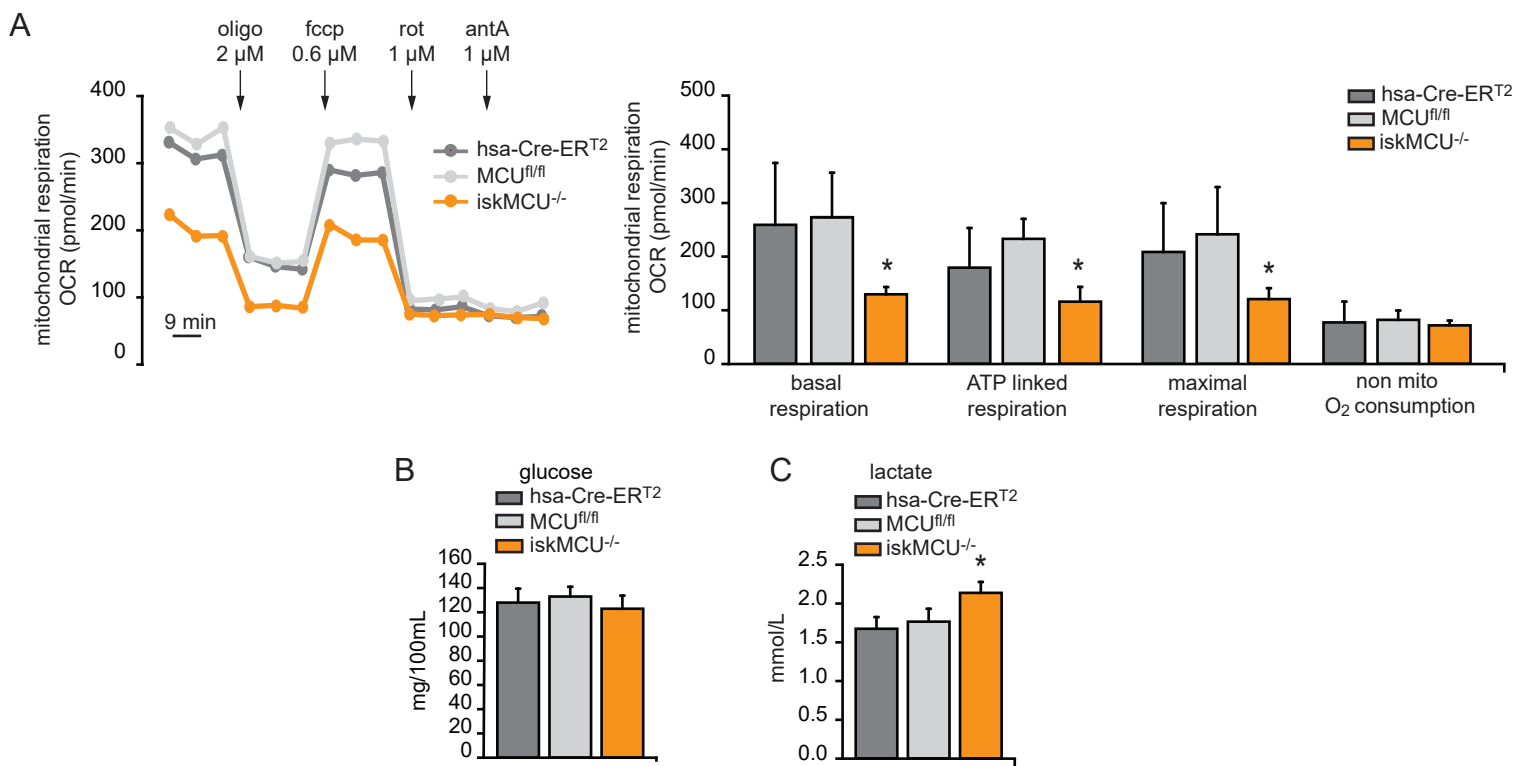

**Fig S5.** *iskMCU*<sup>-/-</sup> mice showed impaired metabolism, related to Figure 6

A OCR measurements indicated reduced respiratory capacity in *iskMCU*<sup>-/-</sup> FDB myofibers compared to two different controls (HSA-Cre-ERT<sup>2</sup> and MCU<sup>fl/fl</sup>). All animals received tamoxifen treatment. Left: representative traces. Right: quantification. To calculate basal and maximal respiration, non mitochondrial O<sub>2</sub> consumption was subtracted from absolute values. ATP linked respiration was calculated as the difference between basal and oligomycin-insensitive O<sub>2</sub> consumption. Data are normalized on mean Calcein fluorescence. \**p* < 0.05, t- test (two-tailed, unpaired) of 10 samples per condition. Data are presented as mean ±SD. **B** *iskMCU*<sup>-/-</sup> mice had unaltered fasting glycemia compared to HSA-Cre-ERT<sup>2</sup> and MCU<sup>fl/fl</sup> controls. All animals received tamoxifen treatment. Data are presented as mean ±SD (5 animals per condition). **C** Blood lactate concentration was increased in *iskMCU*<sup>-/-</sup> mice compared to controls (HSA-Cre-ERT<sup>2</sup> and MCU<sup>fl/fl</sup>). All animals received tamoxifen treatment. \**p* < 0.05, t- test (two-tailed, unpaired) of 4 animals per condition. Data are presented as mean ±SD.
